# Supplementary material for: Ribosomal S6 kinase 1 regulates inflammaging via the senescence secretome
Source: PubMed Central journal article supplement (PMC11564105; doi:10.1038/s43587-024-00695-z), 2024-08-29
Supplement: 43587_2024_695_MOESM1_ESM.pdf [file 43587_2024_695_MOESM1_ESM.pdf]

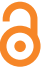

---

# Ribosomal S6 kinase 1 regulates inflammaging via the senescence secretome

---

In the format provided by the authors and unedited

**Supplementary information** includes:

**Supplementary Table 1. List of siRNA sequences used in this study.**

**Supplementary Table 2. List of antibodies and dilutions used for IF and WB.**

**Supplementary Table 3. List of RT-qPCR primers used in this study.**

The three tables are included as part of the file **SupTables1to3Gallage.xlsx**
