# Supplementary material for: Ribosomal S6 kinase 1 regulates inflammaging via the senescence secretome
Source: PubMed Central journal article supplement (PMC11564105; doi:10.1038/s43587-024-00695-z), 2024-08-29
Supplement: 43587_2024_695_MOESM18_ESM.pdf [file 43587_2024_695_MOESM18_ESM.pdf]

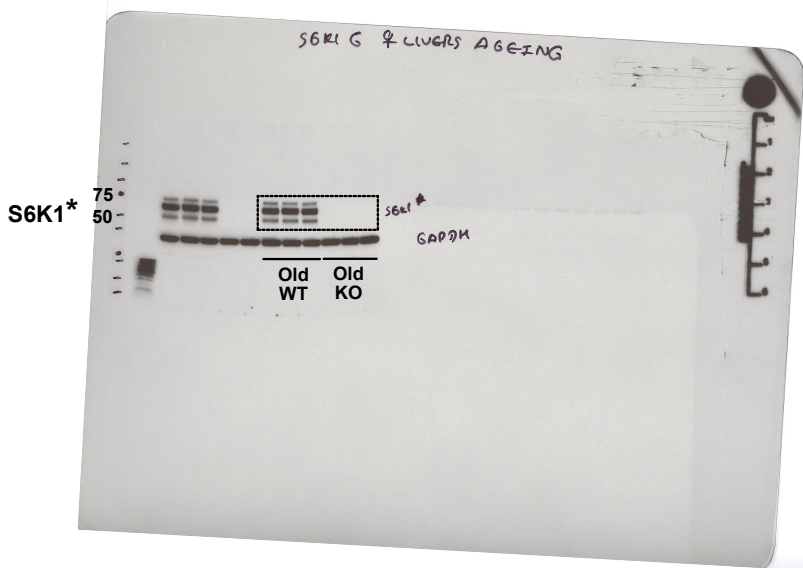

Uncropped images from immunoblotting in **Fig. 1b**.

**Black dotted boxes** indicate cropped images shown in the indicated Figure Panels.

Molecular weights (kDa) of size markers are shown as indicated.

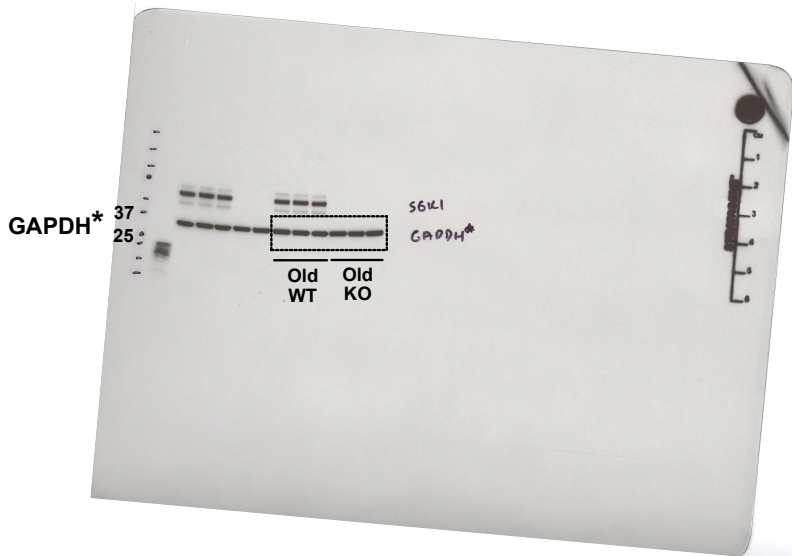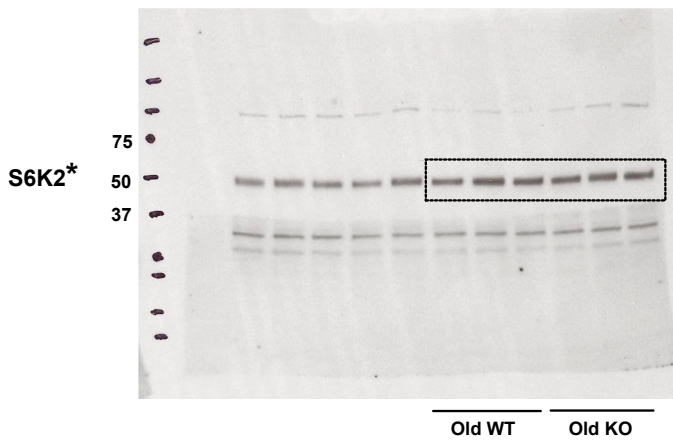

Membrane was cut to simultaneously incubate with multiple antibodies.
