# Supplementary material for: Ribosomal S6 kinase 1 regulates inflammaging via the senescence secretome
Source: PubMed Central journal article supplement (PMC11564105; doi:10.1038/s43587-024-00695-z), 2024-08-29
Supplement: 43587_2024_695_MOESM19_ESM.pdf [file 43587_2024_695_MOESM19_ESM.pdf]

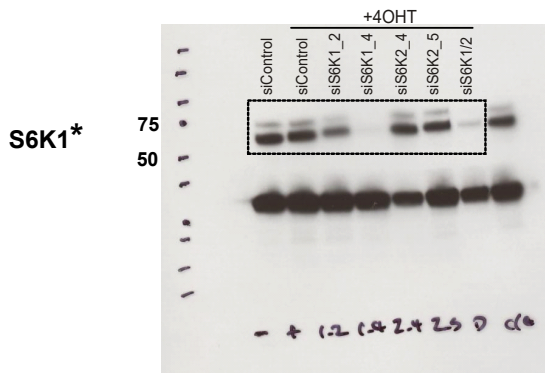

Uncropped images from immunoblotting in **Fig. 5j**.

**Black dotted boxes** indicate cropped images shown in the indicated Figure Panels.

Molecular weights (kDa) of size markers are shown as indicated.

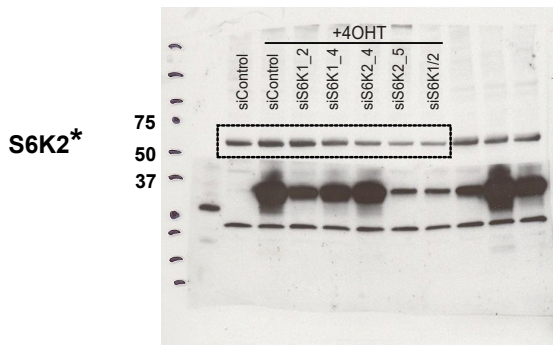

Membrane was cut to simultaneously incubate with multiple antibodies.

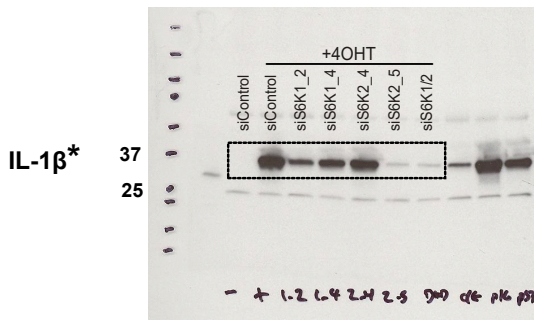

Membrane was cut to simultaneously incubate with multiple antibodies.

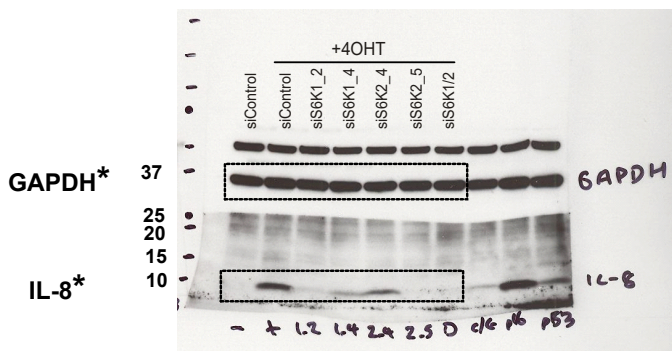

Membrane was cut to simultaneously incubate with multiple antibodies.
